# Supplementary material for: Overcoming model instability in tree-ring-based temperature reconstructions using a multi-species method: A case study from the Changbai Mountains, northeastern China
Source: Copernicus journal article supplement (doi:10.5194/cp-2021-2), 2021-01-11
Supplement: Supplementary file 1 [file cp-2021-2-supplement.pdf]

1 ***Supplementary Material for “Overcoming model instability in tree-ring-***  
2 ***based temperature reconstructions using a multi-species method: A case***  
3 ***study from the Changbai Mountains, northeastern China”***

4 Liangjun Zhu<sup>1,2</sup>, Shuguang Liu<sup>1</sup>, Haifeng Zhu<sup>3</sup>, David J. Cooper<sup>4</sup>, Danyang Yuan<sup>2</sup>, Yu Zhu<sup>1</sup>, Zongshan Li<sup>5</sup>,  
5 Yuandong Zhang<sup>6</sup>, Hanxue Liang<sup>7</sup>, Xu Zhang<sup>8</sup>, Wenqi Song<sup>2</sup>, Xiaochun Wang<sup>2,\*</sup>

6 <sup>1</sup>National Engineering Laboratory for Applied Technology of Forestry & Ecology in South China, College of Life Science and Technology,  
7 Central South University of Forestry and Technology, Changsha 410004, China

8 <sup>2</sup>Center for Ecological Research and Key Laboratory of Sustainable Forest Ecosystem Management-Ministry of Education, School of  
9 Forestry, Northeast Forestry University, Harbin 150040, China

10 <sup>3</sup>Institute of Tibetan Plateau Research, Chinese Academy of Sciences, Beijing 100864, China

11 <sup>4</sup>Department of Forest and Rangeland Stewardship, Colorado State University, Fort Collins, CO 80523, USA

12 <sup>5</sup>State Key Laboratory of Urban and Regional Ecology, Research Center for Eco-Environmental Sciences, Chinese Academy of Sciences,  
13 Beijing 100085, China

14 <sup>6</sup>Key Laboratory of Forest Ecology and Environment of National Forestry and Grassland Administration, Research Institute of Forest  
15 Ecology, Environment and Protection, Chinese Academy of Forestry, Beijing 100091, China

16 <sup>7</sup>Institute of Loess Plateau, Shanxi University, Taiyuan 030006, China

17 <sup>8</sup>College of Forestry, Northwest A&F University, Yangling 712100, China

18 *\*Correspondence to: Xiaochun Wang (wangx@nefu.edu.cn)*

19

## Supplementary Tables and Figures

20

**Table S1. Site description and statistical characteristics for each chronology from the Changbai Mountains.**

| Site code | Species               | Long. (°E) | Lat. (°N) | Elev. (m) | C/T    | R <sub>bar</sub> | EPS  |
|-----------|-----------------------|------------|-----------|-----------|--------|------------------|------|
| L BSPK    | <i>P. koraiensis</i>  | 128.041    | 44.076    | 908       | 109/61 | 0.27             | 0.94 |
| L BSFM    | <i>F. mandshurica</i> | 128.041    | 44.076    | 908       | 62/41  | 0.30             | 0.91 |
| M LPK     | <i>P. koraiensis</i>  | 128.117    | 43.973    | 950       | 34/34  | 0.19             | 0.80 |
| D HPK     | <i>P. koraiensis</i>  | 127.840    | 42.942    | 1095      | 66/35  | 0.59             | 0.92 |
| H SFM     | <i>F. mandshurica</i> | 127.534    | 42.683    | 704       | 39/22  | 0.22             | 0.77 |
| L SHPK    | <i>P. koraiensis</i>  | 127.795    | 42.517    | 853       | 42/22  | 0.24             | 0.80 |
| L SHFM    | <i>F. mandshurica</i> | 127.795    | 42.517    | 853       | 43/22  | 0.49             | 0.93 |
| C BSFM    | <i>F. mandshurica</i> | 128.117    | 42.417    | 718       | 38/22  | 0.44             | 0.94 |

21

**Notes:** C/T = Core /Tree number; R<sub>bar</sub> = the mean correlation coefficient between all tree-ring series used in a chronology; EPS =

22

Expressed population signal statistic.

23 **Table S2. Correlation matrix among the site and regional chronologies during the common period (1858-2011).**

|       | DHPK   | LBSPK  | LSHPK  | MLPK   | CBSFM  | HSFM   | LBSFM  | LSHFM  | PK     | FM     |
|-------|--------|--------|--------|--------|--------|--------|--------|--------|--------|--------|
| LBSPK | 0.47** |        |        |        |        |        |        |        |        |        |
| LSHPK | 0.47** | 0.47** |        |        |        |        |        |        |        |        |
| MLPK  | 0.47** | 0.56** | 0.48** |        |        |        |        |        |        |        |
| CBSFM | 0.10   | 0.25** | 0.08   | 0.32** |        |        |        |        |        |        |
| HSFM  | 0.16   | 0.22** | 0.04   | 0.31** | 0.71** |        |        |        |        |        |
| LBSFM | 0.11   | 0.35** | 0.08   | 0.35** | 0.58** | 0.75** |        |        |        |        |
| LSHFM | 0.11   | 0.01   | -0.06  | 0.25** | 0.74** | 0.79** | 0.65** |        |        |        |
| PK    | 0.78** | 0.81** | 0.76** | 0.78** | 0.24** | 0.23** | 0.29** | 0.09   |        |        |
| FM    | 0.14   | 0.22** | 0.03   | 0.35** | 0.86** | 0.93** | 0.83** | 0.91** | 0.23** |        |
| ALL   | 0.56** | 0.64** | 0.48** | 0.70** | 0.72** | 0.76** | 0.73** | 0.67** | 0.76** | 0.81** |

24 **Notes:** Tree-ring indices of combined *P. koraiensis* (PK), combined *F. mandshurica* (FM), and mixed species (ALL) were calculated  
 25 using a simple arithmetic average.

26

27 **Table S3. Correlations between the growing-season minimum temperature reconstruction and the monthly Atlantic**  
 28 **Multidecadal Oscillation index from previous April to current September.**

|     | <i>R</i> | <i>n</i> |
|-----|----------|----------|
| Apr | 0.29     | 159      |
| May | 0.36     | 159      |
| Jun | 0.38     | 159      |
| Jul | 0.40     | 159      |
| Aug | 0.42     | 159      |
| Sep | 0.43     | 159      |
| Oct | 0.40     | 159      |
| Nov | 0.30     | 159      |
| Dec | 0.28     | 159      |
| JAN | 0.25     | 160      |
| FEB | 0.25     | 160      |
| MAR | 0.23     | 160      |
| APR | 0.23     | 160      |
| MAY | 0.29     | 160      |
| JUN | 0.34     | 160      |
| JUL | 0.37     | 160      |
| AUG | 0.40     | 160      |
| SEP | 0.45     | 160      |

29 **Notes:** All the correlation coefficients in the table are significant at the 0.01 level.

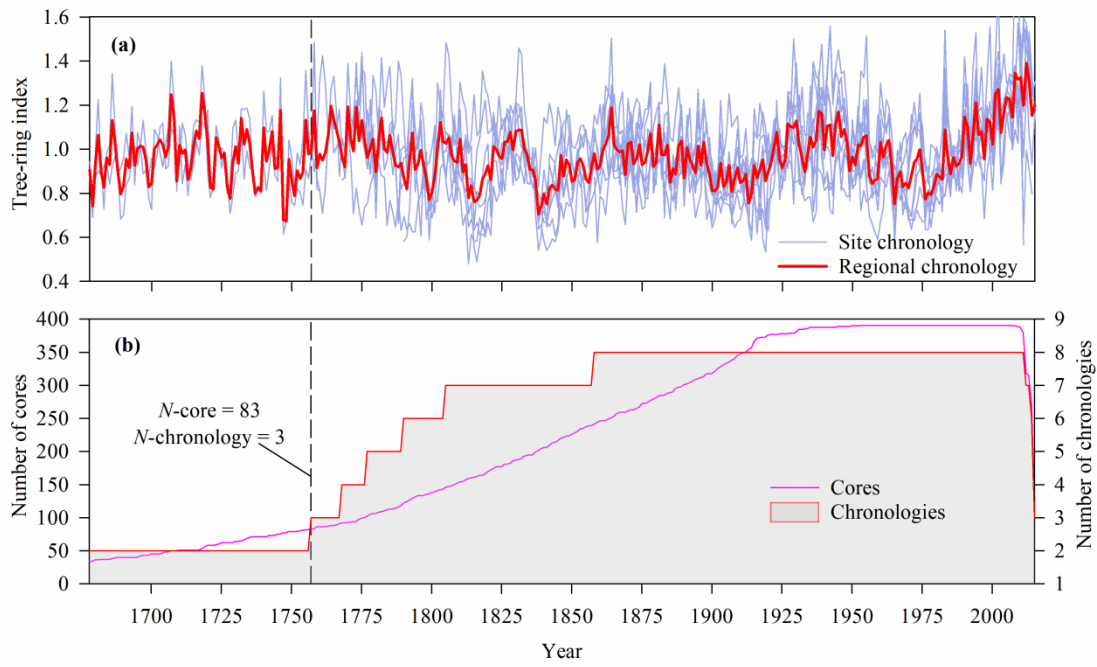

30

31 **Figure S1. The (a) single-site and regional tree-ring-width chronologies and (b) the sample depth of the regional chronology**  
 32 **for the northern Changbai Mountains. The regional chronology's reliable portion is from 1757 to 2015, with cores  $\geq 83$  and site**  
 33 **chronologies  $\geq 3$ .**

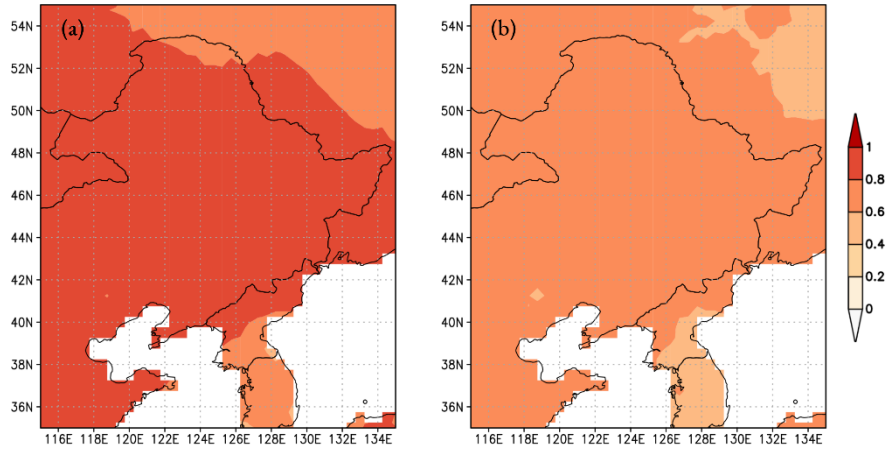

34

35

36

37

**Figure S2. Spatial correlation fields of (a) actual and (b) reconstructed growing-season (April-September) minimum temperatures for the northern Changbai Mountains with April-September averaged CRU TS4.04 minimum temperatures for the period 1958-2015. Maps with filled  $p$ -values  $> 5\%$  were masked out.**
